# Supplementary material for: Preparation of highly porous carbon through activation of NH4Cl induced hydrothermal microsphere derivation of glucose
Source: Royal Society of Chemistry journal article supplement (doi:10.1039/c6ra26141h), 2017-01-01
Supplement: c6ra26141h1.pdf [file c6ra26141h1.pdf]

Supplementary information for

**Preparation of Highly Porous Carbon through Activation of  $\text{NH}_4\text{Cl}$  Induced Hydrothermal  
Microsphere Derivation of Glucose**

Chunyan Zhang, Shuang Lin, Junjun Peng, Yanzhong Hong, Zhiyong Wang and Xianbo Jin

College of Chemistry and Molecular Sciences, Hubei Key Laboratory of Electrochemical Power  
Sources, Wuhan University, Wuhan, 430072, P.R. China.

E-mail: [xbjin@whu.edu.cn](mailto:xbjin@whu.edu.cn);

Fax: +86-027-68756319; Tel: +86-027-68756319

**Table S1. The elemental composition of different samples as indicated.**

| Samples  | C<br>(at%) | N<br>(at%) | O<br>(at%) | pyridinic-<br>N<br>(at%) | NH <sub>2</sub> - N<br>(at%) | pyrrolic-N<br>(at%) | graphitic-<br>N<br>(at%) | pyridine-<br>N-oxide<br>(at%) |
|----------|------------|------------|------------|--------------------------|------------------------------|---------------------|--------------------------|-------------------------------|
| A-NSC    | 91.7       | 0          | 8.3        | -                        | -                            | -                   | -                        | -                             |
| A-N-MSC1 | 91.95      | 0.95       | 7.1        | 0.15                     | -                            | 0.43                | 0.25                     | 0.12                          |
| A-N-MSC2 | 92.51      | 1.7        | 5.79       | 0.26                     | -                            | 0.98                | 0.30                     | 0.16                          |
| NSC      | 77.7       | 0          | 22.3       | -                        | -                            | -                   | -                        | -                             |
| N-MSC1   | 79.71      | 2.78       | 17.51      | 0.42                     | 0.39                         | 1.52                | 0.45                     | -                             |
| N-MSC2   | 79.7       | 4.24       | 16.06      | 0.76                     | 0.54                         | 2.19                | 0.74                     | -                             |

**Table S2. The specific surface area and pore-structure parameters of different samples as indicated.**

| Samples  | S <sub>BET</sub> <sup>a</sup> m <sup>2</sup> g <sup>-1</sup> | S <sub>micro</sub> <sup>b</sup> m <sup>2</sup> g <sup>-1</sup> | V <sub>total</sub> <sup>c</sup> cm <sup>3</sup> g <sup>-1</sup> | APD <sup>d</sup> nm |
|----------|--------------------------------------------------------------|----------------------------------------------------------------|-----------------------------------------------------------------|---------------------|
| A-NSC    | 2385                                                         | 1173                                                           | 1.36                                                            | 3.53                |
| A-N-MSC1 | 2795                                                         | 1140                                                           | 1.58                                                            | 3.39                |
| A-N-MSC2 | 3003                                                         | 1278                                                           | 1.62                                                            | 2.56                |
| NSC      | 10.81                                                        | -                                                              | -                                                               | -                   |
| N-MSC1   | 0.93                                                         | -                                                              | -                                                               | -                   |
| N-MSC2   | 0.19                                                         | -                                                              | -                                                               | -                   |
| A-H-MSC  | 1789                                                         | 825                                                            | 0.99                                                            | 3.20                |
| A-Na-MSC | 1630                                                         | 1207                                                           | 0.81                                                            | 3.35                |

<sup>a</sup>Specific surface area calculated using the Brunauer–Emmett–Teller (BET) method for the adsorption data in the relative pressure interval from 0.16 to 0.20. <sup>b</sup>t-plot micropore area. <sup>c</sup>Total pore volume calculated at P/P<sub>0</sub> = 0.995. <sup>d</sup>average pore size from Barrett–Joyner–Halenda (BJH) adsorption curves.

## Supplementary figures

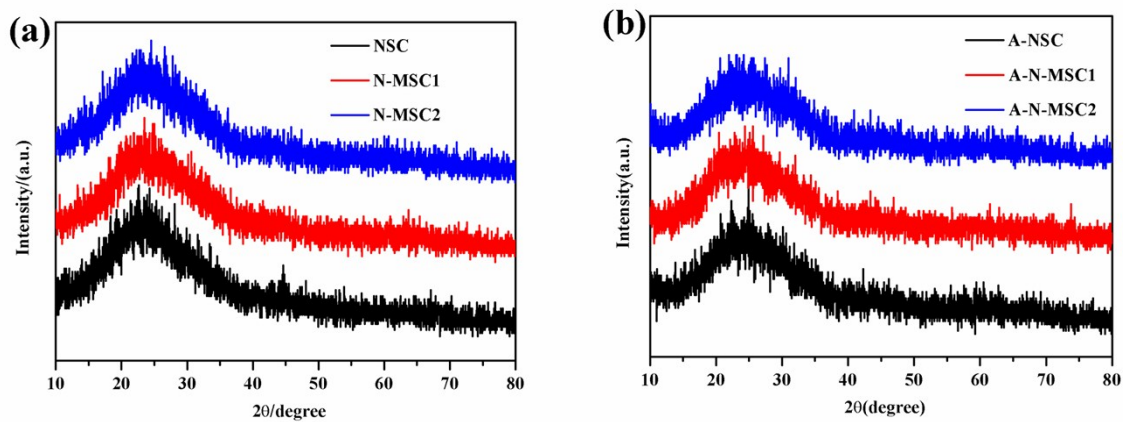

**Fig. S1.** XRD patterns of several HTC carbons (as indicated) before (a) and after (b) the KOH activation.

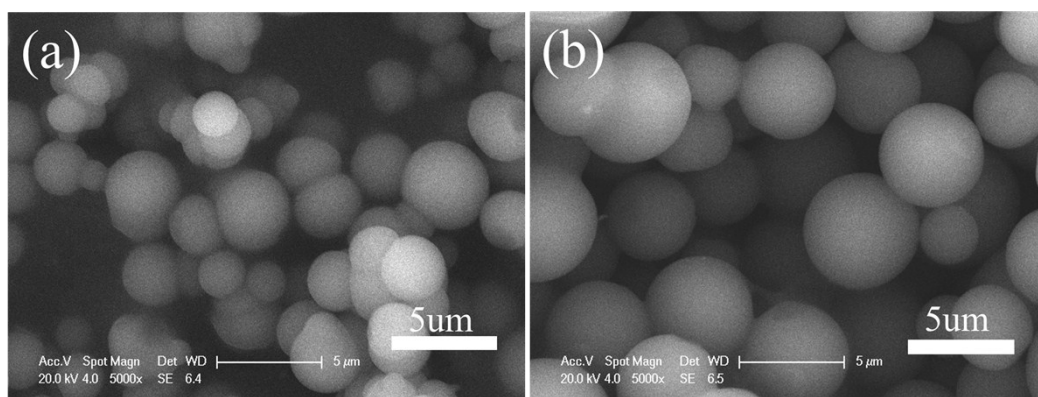

**Fig. S2.** SEM images of H-MSC, and Na-MSC.

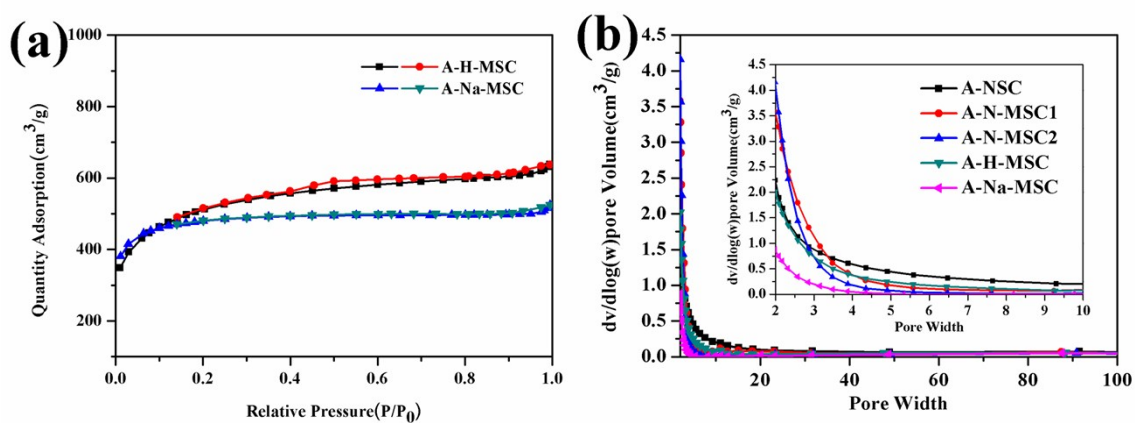

**Fig. S3.** (a) BET  $N_2$  sorption isotherms of A-H-MSC and A-Na-MSC, respectively. (b) BJH pore size distribution

of A-NSC, A-N-MSC1, A-N-MSC2, A-H-MSC and A-Na-MSC.

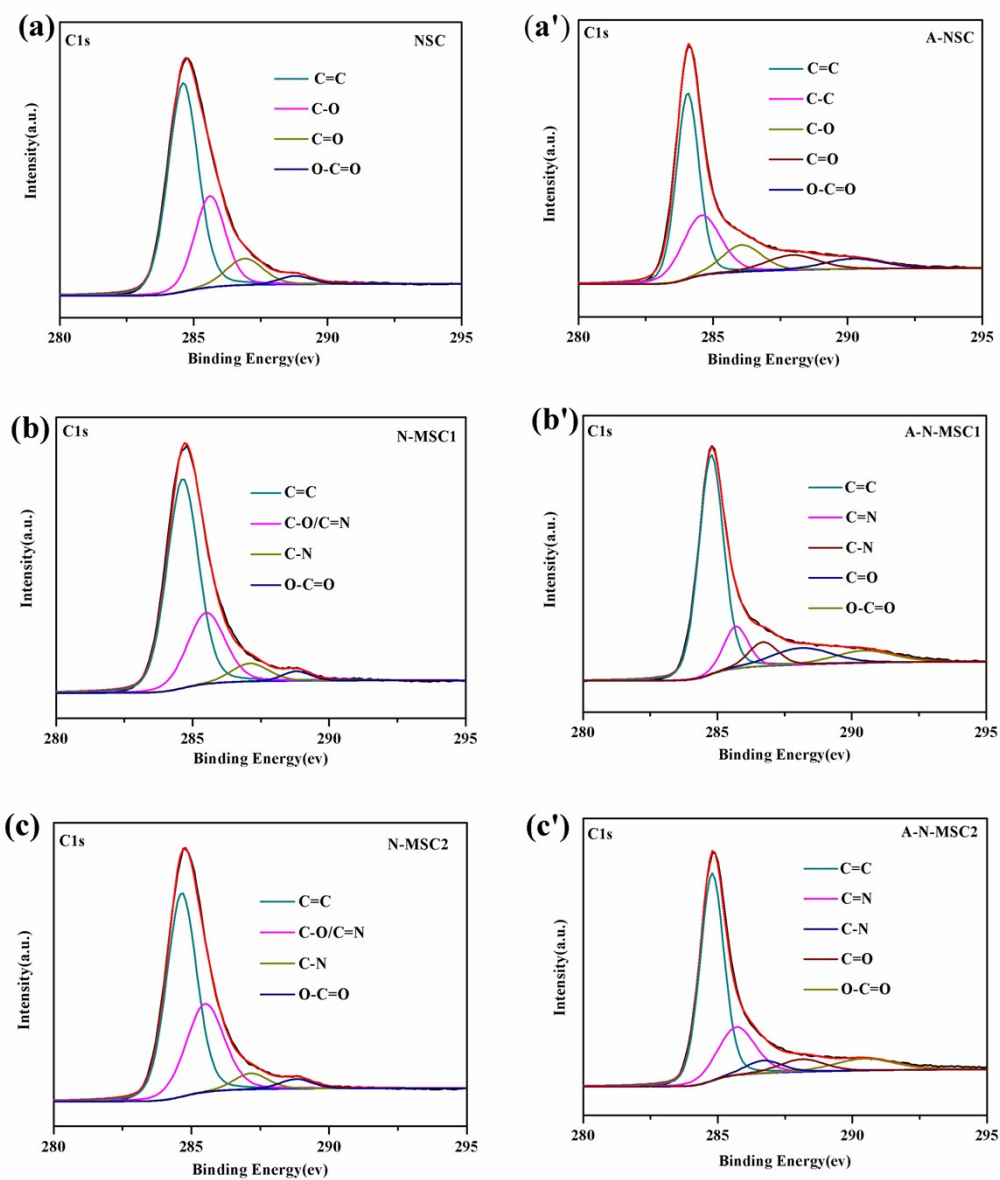

Fig. S4. XPS spectra of C1s peaks and their resolution results of different samples as indicated.

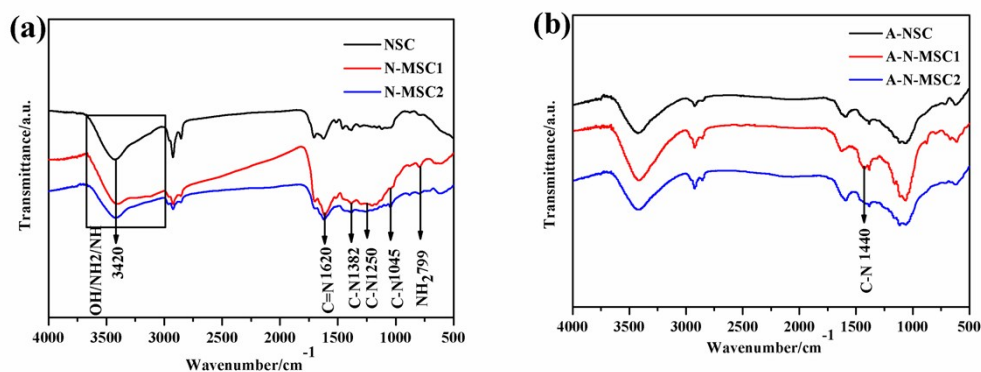

Fig. S5. FT-IR spectra of several HTC carbons (as indicated) before (a) and after (b) the KOH activation.
